CORRECTION

# Correction: Does bribery increase maternal mortality? Evidence from 135 Sub-Saharan African regions

Veronica Toffolutti, Eugenio Paglino, Alexandros Kentikelenis, Letizia Mencarini, Arnstein Aassve

In the Introduction section, there is an error in the last paragraph. The correct sentence is: The paper proceeds as follows we present the methodological approach in section 2, the results in section 3, and finally we offer our conclusions.

The heading of section 2, subsection 2.1 and subdivision 2.1.1 appears incorrectly in the article. The correct heading is:

2. The methodological approach
- 2.1. Data sources

## Reference

1. Toffolutti V, Paglino E, Kentikelenis A, Mencarini L, Aassve A (2023) Does bribery increase maternal mortality? Evidence from 135 Sub-Saharan African regions. *PLOS Glob Public Health* 3(12): e0000847. <https://doi.org/10.1371/journal.pgph.0000847> PMID: 38048332

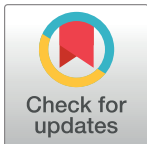

## OPEN ACCESS

**Citation:** Toffolutti V, Paglino E, Kentikelenis A, Mencarini L, Aassve A (2024) Correction: Does bribery increase maternal mortality? Evidence from 135 Sub-Saharan African regions. *PLOS Glob Public Health* 4(7): e0003570. <https://doi.org/10.1371/journal.pgph.0003570>

**Published:** July 24, 2024

**Copyright:** © 2024 Toffolutti et al. This is an open access article distributed under the terms of the [Creative Commons Attribution License](https://creativecommons.org/licenses/by/4.0/), which permits unrestricted use, distribution, and reproduction in any medium, provided the original author and source are credited.
